# Supplementary material for: Early Prediction of Postoperative Pulmonary Complications After Esophagectomy Using Lung and Diaphragmatic Ultrasound: A Multicenter Prospective Study
Source: Research Square preprint supplement (doi:10.21203/rs.3.rs-8810768/v1), 2026-02-24
Supplement: Supplementary file 1 [file 240194bbe514434408da43c1.docx]

**Table** **2.** Ultrasound findings on POD0 by PPC status

|  | Time | PPC (n = 115) | Non-PPC (n = 160) | p-value |
| --- | --- | --- | --- | --- |
| LUS total score | POD0 | 8 [5–11] | 4 [3–7] | <0.001 |
| Diaphragmatic excursion (mm) | POD0 | 15.4 ± 5.1 | 19.7 ± 5.8 | <0.001 |
| Forced diaphragmatic excursion (mm) | POD0 | 26.2 ± 9.2 | 40.9 ± 14.3 | < 0.001 |
| Diaphragmatic ratio (forced/quiet) | POD0 | 1.8 ± 0.5 | 2.1 ± 0.5 | < 0.001 |
| Alveolar consolidation | POD0 | 57 (51.4) | 9 (5.8) | < 0.001 |
| Pleural effusion | POD0 | 2 (1.9) | 1 (0.6) | NA |

*Values are number (%), mean ± standard deviation or median [interquartile range]. Abbreviations: LUS: lung ultrasound; POD: postoperative day; PPC: postoperative pulmonary complications.*
