# Supplementary material for: Early Prediction of Postoperative Pulmonary Complications After Esophagectomy Using Lung and Diaphragmatic Ultrasound: A Multicenter Prospective Study
Source: Research Square preprint supplement (doi:10.21203/rs.3.rs-8810768/v1), 2026-02-24
Supplement: Supplementary file 3 [file 935e04c929d44e0db11227e0.docx]

# Supplemental Material – Study Protocol Translation

## Study Title

Lung Ultrasound in the Early Detection of Postoperative Pulmonary Complications After Esophagectomy (OESOLUS).

## Rationale and Background

Esophageal cancer carries a poor prognosis, with an estimated 5-year survival of 15%. When operability criteria are met, esophagectomy is the reference treatment, offering a 5-year survival rate of approximately 45% at the cost of significant perioperative morbidity and mortality, mainly related to pulmonary and surgical complications. Despite steady decreases in postoperative mortality over the past 30 years, respiratory morbidity remains high (30–40%), primarily due to the thoracic approach and intraoperative single-lung ventilation. Postoperative pulmonary complications (PPCs) include bronchial congestion, atelectasis, pneumonia, acute respiratory distress syndrome, pleural effusion, and pneumothorax. Pneumonia is particularly feared in the context of an anastomotic leak, as it significantly increases hospital mortality.

Chest X-ray is essential but often difficult to interpret in this setting, while thoracic computed tomography (CT) remains the gold standard. However, CT requires patient transport, which can be unsafe in unstable postoperative patients, and exposes them to radiation. Lung ultrasound has emerged as a reliable bedside tool for diagnosing pulmonary infections in the intensive care unit, with a sensitivity close to CT. It is non-irradiating, repeatable, and can be performed at any time without patient transfer. Recent studies have demonstrated its utility for early detection of ventilatory support needs following major abdominal surgery.

## Objectives

Primary Objective: To determine the predictive value of lung ultrasound (LUS) performed within 1 hour of extubation in identifying postoperative pulmonary complications (PPCs) after esophagectomy.

Secondary Objectives:

- To assess the predictive value of LUS performed at postoperative Day 1.
- To assess diaphragmatic excursion (quiet and deep breath) at Day 0, Day 1, and Day 3 as a predictor of PPCs.
- To assess the predictive value of both LUS and DUS at postoperative Day 1
- To develop a predictive model for postoperative day 1 of LUS, DUS and other clinical variables for PPCs.
- To evaluate whether the presence of lung consolidations or pleural effusion on ultrasound is predictive of PPCs.
- To describe complications according to the Dindo-Clavien classification at Day 7.
- To assess 30-day mortality.

## Study Design

This is a prospective, observational, multicenter cohort study. Patients undergoing thoracic esophagectomy will be enrolled. LUS will be performed within one hour after extubation (Day 0), and repeated at Day 1 and Day 3. Diaphragmatic ultrasound will also be performed at these timepoints.

## Population

Inclusion Criteria:

- Adults undergoing thoracic esophagectomy, regardless of surgical indication.

Exclusion Criteria:

- Severe COPD (GOLD stage >2)
- Pulmonary emphysema
- History of pulmonary surgery
- Legal incapacity (tutelage or curatorship)
- Patient refusal
- Lack of health insurance coverage

## Sample Size

Based on an expected 35% incidence of PPCs within 7 days after surgery, and assuming a null hypothesis AUC of 0.70 versus an alternative of 0.80, with α=5% and β=20%, a total of 249 patients are required. Due to administrative procedures causing a delay in opening the third center, we requested and obtained regulatory approval to increase the required number of subjects to 275 (Comité de protection des personnes Ouest IV, 25 October 2024).

## Outcome Measures

Primary Outcome: Area under the ROC curve (AUC) of the LUS score at Day 1 for the prediction of PPCs within 7 days after surgery.

Secondary Outcomes:

- AUC of LUS score at Day 0 and Day 3 for PPC prediction
- Presence of lung consolidation on ultrasound
- Presence of pleural effusion at Day 0, Day 1, and Day 3
- Diaphragmatic excursion measurements
- Complications graded according to Dindo-Clavien classification (Day 7)
- Mortality at 30 days
- AUC of a score according to LUS, diaphragmatic excursion and clinical elements

## Lung and diaphragmatic ultrasound acquisition

Lung ultrasound examinations are performed using a convex probe operating at 2–5 MHz with the patient lying at a 30-degree angle on the bed, and experience no pain. Assessments are scheduled within 1 hour after extubation (POD0) and repeated at predefined postoperative time points (e.g., POD1 and POD3; with daily follow-up according to local workflow).

**Scanning scheme**

Each hemithorax is divided into 6 regions (total 12 regions): anterior, lateral, and posterior zones, each subdivided into upper and lower areas. The probe is placed in intercostal spaces with the marker oriented cephalad, and each region is scanned to identify the predominant pleuro-parenchymal pattern.

For each of the 12 regions, the worst ultrasound pattern observed in that region will be retained and scored as follows:

- **0:** Normal aeration (A-lines or ≤2 isolated B-lines)
- **1:** Moderate loss of aeration (≥3 well-spaced B-lines)
- **2:** Severe loss of aeration (coalescent B-lines / “white lung”)
- 3: Complete loss of aeration (consolidation)

The global LUS score is the sum of all regional scores, ranging from 0 to 36. Presence/absence of alveolar consolidation and pleural effusion will be also recorded as categorical findings.

Definitions captured during LUS

- **Alveolar consolidation**: tissue-like pattern with loss of aeration (often with dynamic air bronchograms when present).
- **Pleural effusion**: anechoic (or complex) dependent fluid collection in the pleural space.
  These findings will be documented per exam and used in analyses as specified.

Diaphragmatic ultrasound will be performed at the same time points as LUS using the same convex probe, with the patient in a 30-degree position and experience no pain. The aim is to quantify diaphragmatic excursion during quiet breathing and during deep inspiration.

A subcostal view is used to visualize the hemidiaphragm, typically through an anterior subcostal acoustic window. Once the diaphragm is clearly identified, M-mode is applied to measure excursion as the craniocaudal displacement of the diaphragmatic line between end-expiration and peak inspiration.

**Measurement procedure**

- After ensuring stable conditions and minimizing pain-related respiratory limitation (adequate analgesia), measurements were obtained during:
  1. quiet breathing (≥3 calm breaths), and
  2. deep inspiration (maximal inspiratory effort).
- For each breathing condition, three measurements will be recorded; the best value will be retained for analysis.

## Statistical Analysis

Analyses will be conducted using SAS version 9.4 or higher. Categorical variables will be summarized as counts and percentages, while continuous variables will be expressed as mean±SD or median (IQR) as appropriate. Comparisons will use Student’s t-test or Mann–Whitney U test for continuous variables, and Chi-square or Fisher’s exact test for categorical variables. Predictive ability of the LUS score will be assessed using ROC curve analysis, AUC, and Youden’s index. Sensitivity, specificity, positive predictive value, negative predictive value, and correctly classified proportions will be reported.

## Ethics and Regulatory Aspects

The study has been approved by CPP OUEST IV (approval number CPP22/066_3). It complies with the French Public Health Code and Good Clinical Practice guidelines. The sponsor is University Hospital of Lille. All patients will provide informed consent prior to participation.
