# Supplementary material for: Early Prediction of Postoperative Pulmonary Complications After Esophagectomy Using Lung and Diaphragmatic Ultrasound: A Multicenter Prospective Study
Source: Research Square preprint supplement (doi:10.21203/rs.3.rs-8810768/v1), 2026-02-24
Supplement: Supplementary file 4 [file ad158590730b12a1b71dc260.docx]

**Table 1.** Baseline and perioperative characteristics and evolution

|  | All patients (n=275) | PPCs  (n= 115) | Non-PPCs  (n=160) |
| --- | --- | --- | --- |
| **Baseline data** |  |  |  |
| Age, years | 63.7 ± 10.2 | 61.6 ± 10.9 | 65.2 ± 9.5 |
| Male, n (%) | 223 (81.1) | 92 (80.0) | 131 (81.9) |
| Body mass index, kg.m-2 | 25.7 ± 5.3 | 26.0 ± 5.2 | 25.6 ± 5.3 |
| **Comorbidities** |  |  |  |
| HTA | 135 (49.1) | 60 (52.2) | 75 (46.9) |
| Coronary artery disease | 31 (11.3) | 14 (12.2) | 17 (10.6) |
| COPD | 25 (9.1) | 15 (13.0) | 10 (6.3) |
| Asthma | 13 (4.7) | 7 (6.1) | 6 (3.8) |
| Sleep apnea | 30 (10.9) | 13 (11.3) | 17 (10.6) |
| Peripheral artery disease | 15 (5.5) | 8 (7.0) | 7 (4.4) |
| Ischemic stroke | 13 (4.7) | 5 (4.3) | 8 (5.0) |
| **Smoking status** |  |  |  |
| Never smoked | 141 (51.2) | 51 (44.3) | 83 (51.9) |
| Current smoker | 47 (17.1) | 25 (21.7) | 22 (13.8) |
| Former smoker | 94 (34.2) | 39 (33.9) | 55 (34.4) |
| **Preoperative examination** |  |  |  |
| Hemoglobin, g.dL-1 | 12.8 [11.7, 13.9] | 12.6 [11.8, 13.9] | 12.8 [11.6, 13.9] |
| SpO2, % | 97.0 [96.0, 98.0] | 97.0 [96.0, 98.0] | 97.5 [96.0, 98.0] |
| **ASA classification** |  |  |  |
| I-II | 173 (62.9) | 69 (60.0) | 104 (65.0) |
| III | 102 (37.1) | 46 (40.0) | 56 (35.0) |
| Charlson Comorbidity Index | 3 [2, 4] | 3 [2, 4] | 3 [2, 4] |
| **Histology** |  |  |  |
| Adenocarcinoma | 214 (77.8) | 87 (75.7) | 127 (79.4) |
| Squamous cell carcinoma | 52 (18.9) | 26 (22.6) | 26 (16.3) |
| **Neoadjuvant treatment** |  |  |  |
| Chemotherapy | 236 (85.8%) | 99 (86.1) | 137 (85.6) |
| Radiotherapy | 96 (34.9) | 42 (36.5) | 54 (33.8) |
| Immunotherapy | 13 (4.7) | 2 (1.7) | 11 (6.9) |
| **Intraoperative data** |  |  |  |
| **Type of surgery** |  |  |  |
| Ivor-Lewis | 258 (93.8) | 104 (90.4) | 154 (96.3) |
| McKeown | 17 (6.2) | 11 (9.6) | 6 (3.8) |
| **Surgical approach** |  |  |  |
| TMIE | 224 (81.5) | 87 (75.7) | 137 (85.6) |
| HMIE | 30 (10.9) | 15 (13.0) | 15 (9.4) |
| Open | 21 (7.6) | 13 (11.3) | 8 (5.0) |
| Surgery duration, min | 411 [322, 496] | 422 [351, 518] | 401 [302, 481] |
| Surgical thoracic duration, min | 162 [120, 208] | 163 [127, 214] | 160 [108, 204] |
| Fluid loading, ml.kg-1.h-1 | 6.7 [5.4, 8.3] | 7.2 [5.9, 8.6] | 6.2 [5.2; 8.2] |
| Diuresis, ml.kg-1.h-1 | 0.9 [0.6, 1.3] | 0.9 [0.7, 1.2] | 0.8 [0.5, 1.3] |
| Blood loss | 200 [100, 390] | 200 [100, 400] | 200 [100, 350] |
| Transfusion | 3 (1.1) | 2 (1.7) | 1 (0.6) |
| Norepinephrine | 247 (89.8) | 103 (89.6) | 144 (90.0) |
| **Analgesia** |  |  |  |
| Epidural catheter | 252 (91.6) | 105 (91.3) | 147 (91.9) |
| Paravertebral catheter or block | 16 (5.8) | 8 (7.0) | 8 (5.0) |
| Serratus block  **Postoperative evolution** | 6 (2.2) | 3 (2.6) | 3 (1.9) |
| Anastomotic leakage | 63 (22.9) | 39 (33.9) | 24 (15.0) |
| Dindo-Clavien classification ≥ 3 for any complication | 125 (45.5) | 82 (71.3) | 43 (26.9) |
| SAPS-II | 23 [18; 30] | 25 [19; 30] | 23 [18; 30] |
| SOFA score | 3 [2; 5] | 5 [3; 6] | 3 [2; 4] |
| NIV support, % | 89 (32.4) | 89 (77.4%) | 0 (0) |
| Endotracheal intubation, % | 28 (10.2) | 28 (24.3) | 0 (0) |
| Death at POD30 | 3 (1.1) | 3 (2.6) | 0 (0) |
| ICU LOS | 5 [3; 9] | 9 [6; 15] | 4 [3; 5] |
| Hospital LOS | 14 [10; 22] | 20 [14; 30] | 11 [9; 16] |

*Values are number (%), mean ± standard deviation or median [interquartile range].*

*COPD: chronic obstructive pulmonary disease; HMIE: hybrid minimally-invasive esophagectomy; HTA: arterial hypertension; ICU: intensive care unit; LOS: length of stay; NIV: non-invasive ventilation; PPC: postoperative pulmonary complications; POD: postoperative day; ; SAPS-II: Simplified Acute Physiology Score II; SOFA: sequential organ failure assessment TMIE: totally minimally-invasive esophagectomy.*
