# Supplementary material for: Early Prediction of Postoperative Pulmonary Complications After Esophagectomy Using Lung and Diaphragmatic Ultrasound: A Multicenter Prospective Study
Source: Research Square preprint supplement (doi:10.21203/rs.3.rs-8810768/v1), 2026-02-24
Supplement: Supplementary file 5 [file b28732a834cee30f29ba9bc7.docx]

**Table 3.** Univariateassociation between the variables chosen for the predictive model according to PPC status at day-1.

|  | PPC (n = 115) | Non-PPC (n = 160) | OR [CI95%] | p-value |
| --- | --- | --- | --- | --- |
| LUS POD1 (per point)* | 9.8 ± 4.5 | 5.2 ± 3.4 | 1.36 [1.25 to 1.48] | <0.001 |
| DUS excursion POD1 (per mm)£ | 15.6 ± 7.6 | 20.1 ± 6.4 | 0.87 [0.83 to 0.92] | <0.001 |
| DUS forced excursion POD1 (per mm)$ | 26.4 ± 13.5 | 40.8 ± 13.7 | 0.89 [0.87 to 0.92] | <0.001 |
| DUS ratio POD1 (forced/quiet) $ | 1.8 ± 0.4 | 2.1 ± 0.5 | 0.17 [0.08 to 0.36] | <0.001 |
| Alveolar consolidation POD1& | 70/108 (64.8) | 11/155 (7.1) | 24.12 [11.63 to 50.01] | <0.001 |
| Incision (ref. = totally minimally invasive) |  |  |  |  |
| Hybrid | 15/115 (13.0) | 15/160 (9.4) | 1.57 [0.73 to 3.38] | 0.24 |
| Open | 13/115 (11.3) | 8/160 (5.0) | 2.56 [1.02 to 6.43] | 0.046 |
| Age (per one-year) | 61.7 ± 10.9 | 65.1 ± 9.5 | 0.97 [0.95 to 0.99] | 0.008 |

* available on 259 patients. £ available on 251 patients. $ available on 248 patients. & available on 263 patients.

Abbrevations : ref.= reference; OR = odds-ratio; CI : confidence interval, POD1 = performed within one hour after extubation.
