# Supplementary material for: Early Prediction of Postoperative Pulmonary Complications After Esophagectomy Using Lung and Diaphragmatic Ultrasound: A Multicenter Prospective Study
Source: Research Square preprint supplement (doi:10.21203/rs.3.rs-8810768/v1), 2026-02-24
Supplement: Supplementary file 6 [file c487ec1f3a698c1cef43413a.docx]

| Complication | Definition |
| --- | --- |
| Atelectasis | Lung opacity on chest X-ray with a shift of the mediastinum, hilum or hemidiaphragm toward the affected area, and compensatory over-inflation in the adjacent non-atelectatic lung |
| Acute respiratory failure | Postoperative PaO2 < 8 kPa (60 mmHg) on room air, a PaO2:FiO2 ratio <40 kPa (300 mmHg) or arterial oxyhemoglobin saturation measured with pulse oximetry < 90% requiring oxygen therapy |
| Pneumothorax | Air in the pleural space on chest X-ray with no vascular bed surrounding the visceral pleura |
| Pleural effusion | Chest radiograph blunting of the costophrenic angle, loss of sharp silhouette of the ipsilateral hemidiaphragm in upright position, evidence of displacement of adjacent anatomical structures or (in supine position) a hazy opacity in one hemithorax with preserved vascular shadows.  Or lung ultrasound evidence of extrapleural liquid/fluid: anechoic extrapleural densities.  Only cases requiring thoracocentesis were taken into account. |
| Pneumonia | Patient has received antibiotics for a suspected respiratory infection and met one or more of the following criteria: new or changed sputum, new or changed lung opacities on chest X-ray (or CT-scan), fever, white blood cell count > 12 x 109 |
| Aspiration pneumonitis | Acute lung injury after the inhalation of regurgitated gastric contents |

**eTable 1.** Definition of postoperative pulmonary complications according to the European Perioperative Clinical Outcome definitions

**eTable 2**. Average intraoperative ventilatory parameters during surgery.

|  | **All patients (n = 275)** | **PPCs (n = 115)** | **Non PPCs (n = 160)** |
| --- | --- | --- | --- |
| Duration of anesthesia (min) | 496 [395, 583] | 505 [420, 601] | 492 [377, 576] |
| Tidal volume (ml.kg-1 of PBW) | 7.0 ± 0.5 | 7.0 ± 0.5 | 7.0 ± 0.5 |
| Respiratory rate (breath/min) | 20.6 ± 2.4 | 20.5 ± 2.4 | 20.6 ± 2.3 |
| Peak pressure (cmH2O) | 26.7 ± 3.9 | 27.4 ± 3.8 | 26.2 ± 3.9 |
| Plateau pressure (cmH2O) | 19.7 ± 3.1 | 20.4 ± 3.3 | 191 ± 2.8 |
| PEEP (cmH2O) | 7.3 ± 1.5 | 7.5 ± 1.6 | 7.2 ± 1.4 |
| Driving pressure (cmH2O) | 12.4 ± 3.0 | 13.0 ± 3.1 | 11.9 ± 2.9 |
| End tidal carbon dioxide (mmHg) | 39.2 ± 3.2 | 39.2 ± 3.4 | 39.2 ± 3.0 |
| Intraoperative FiO2 (%) | 54.1 ± 8.6 | 54.6 ± 8.8 | 53.8 ± 8.5 |
| Intraoperative SpO2 (%) | 96.3 ± 1.6 | 96.0 ± 1.7 | 95.5 ± 1.5 |
| One-lung ventilation (OLV) | 246 (89.8) | 106 (92.2) | 140 (87.5) |
| Tidal volume in OLV (ml.kg-1 of PBW) | 5.2 ± 0.6 | 5.2 ± 0.6 | 5.2 ± 0.6 |
| Duration (min) | 170.0 ± 70.2 | 179.0 ± 75.5 | 163.9 ± 65.6 |
| Mechanical power (J.min-1) | 17.9 ± 4.5 | 17.9 ± 4.6 | 17.8 ± 4.5 |

*Values are number (%), mean ± standard deviation or median [interquartile range]. FiO2: inspired fraction of oxygen; PBW: prediceted body weight; PEEP: positive end-expiratory pressure; SpO2: pulsed oxygen saturation.*

*Mechanical power (MP), which integrates ventilatory parameters derived from both ventilator settings and the mechanical properties of the patients' lungs, was calculated retrospectively offline as:*

*MP (J.min-1) = 0.098 x RR x VTe x 0.001 x (PEEP + 0.5 x (Pplat – PEEP) x (Ppeak – PEEP)).*


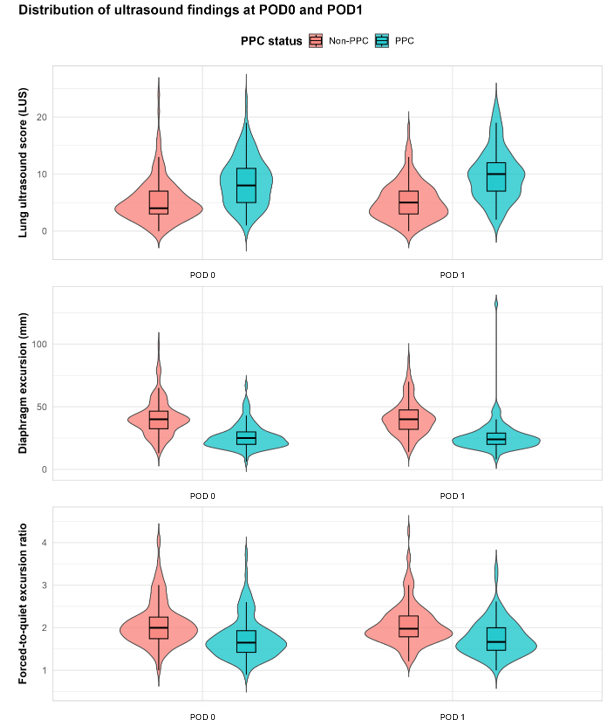


**eFigure 1.** Violin plots of lung ultrasound score (LUS) and diaphragmatic ultrasound (DUS) measurements on postoperative day 0 and 1 in patients with and without postoperative pulmonary complications within 7 days after esophagectomy.

The shape of each violin represents the distribution density, with horizontal lines indicating the median and interquartile range for each group. Abbreviations: POD: postoperative day

**Table 3.** Distribution of lung ultrasound across examined lung zones.

|  | Time | PPC (n = 115) | Non-PPC (n = 160) |
| --- | --- | --- | --- |
| Anterior LUS score  Right  Left | POD0 | 0 [0-1]  0 [0-0]  0 [0-1] | 0 [0-0]  0 [0-0]  0 [0-0] |
| Lateral LUS score  Right  Left | POD0 | 2 [1-4]  1 [0-2]  1 [0-2] | 1 [0-2]  0 [0-1]  1 [0-1] |
| Posterior LUS score  Right  Left | POD0 | 5 [4-7]  2 [1-4]  3 [2-4] | 3 [2-5]  2 [1-2]  2 [1-3] |
| Anterior LUS score  Right  Left | POD1 | 0 [0-2]  0 [0-1]  0 [0-1] | 0 [0-0]  0 [0-0]  0 [0-0] |
| Lateral LUS score  Right  Left | POD1 | 3 [1-4]  1 [0-2]  1 [0.5-2] | 1 [0-2]  0 [0-1]  1 [0-1] |
| Posterior LUS score  Right  Left | POD1 | 6 [4-8  3 [2-4]  3 [2-4] | 4 [2-5]  1 [1-2]  2 [1-3] |

*Values are median [interquartile range]. Abbreviations: LUS: lung ultrasound; POD: postoperative day; PPC: postoperative pulmonary complications.*

**
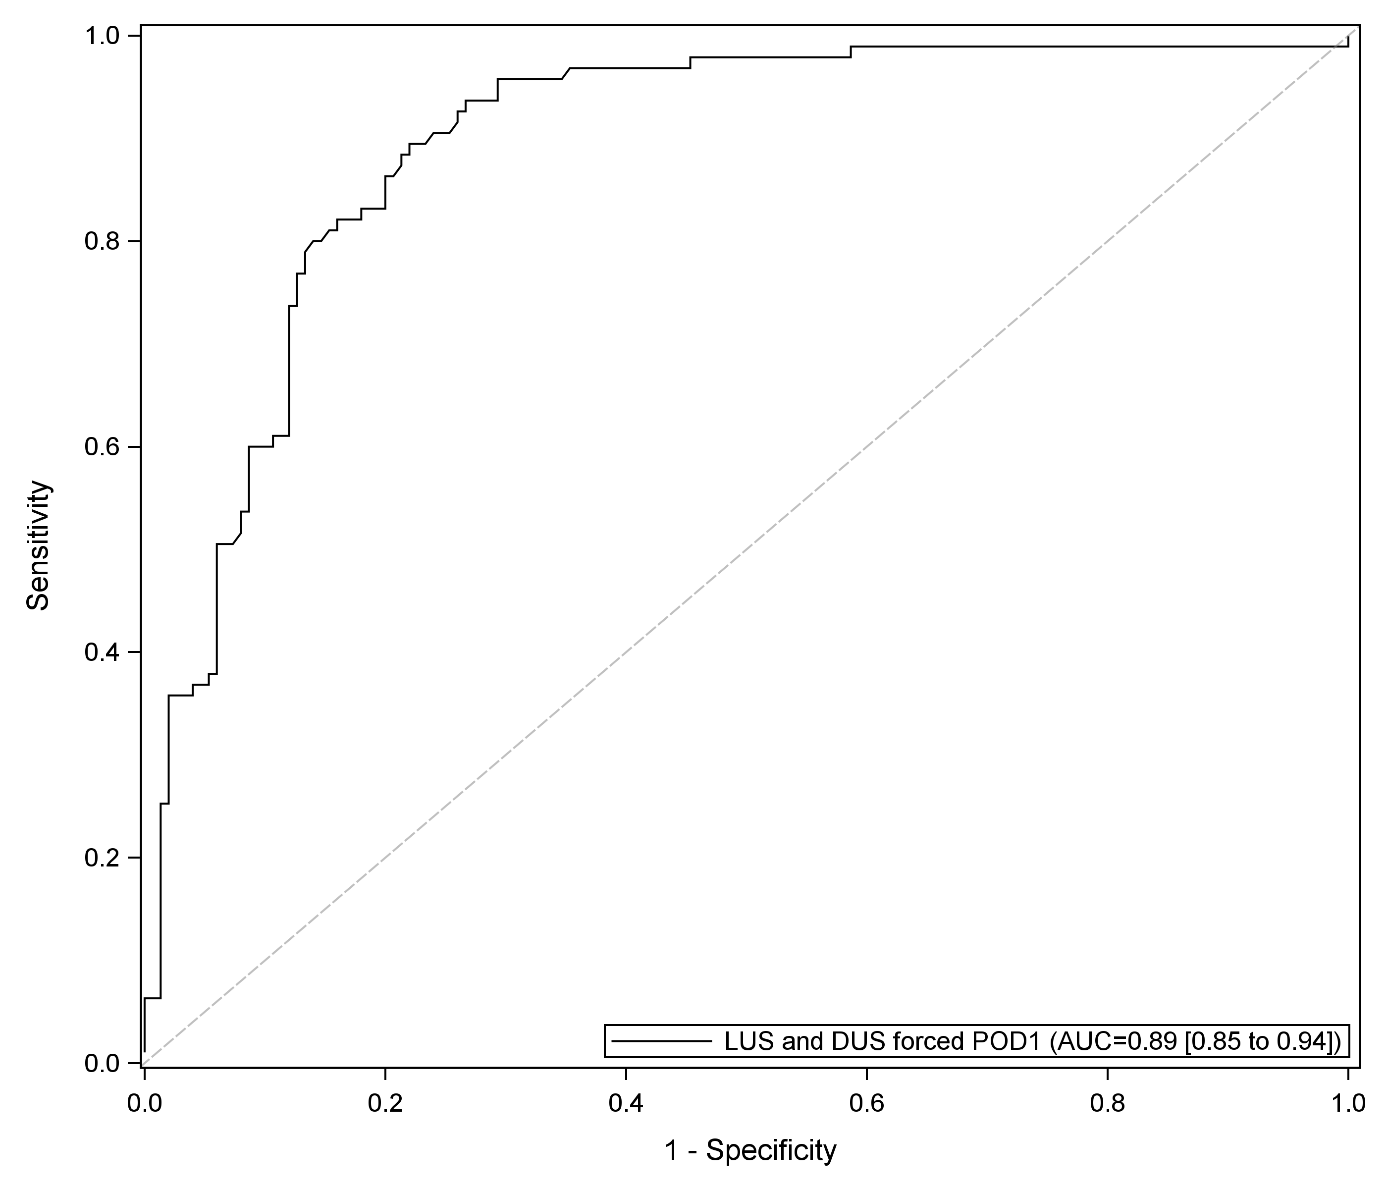
**

**eFigure 2.** ROC curve of combined diaphragmatic excursion in quiet breathing and lung ultrasound score at postoperative day 1 for prediction of postoperative pulmonary complications.

DUS : diaphragmatic ultrasound ; LUS : lung ultrasound score; POD0 : postoperative day 0


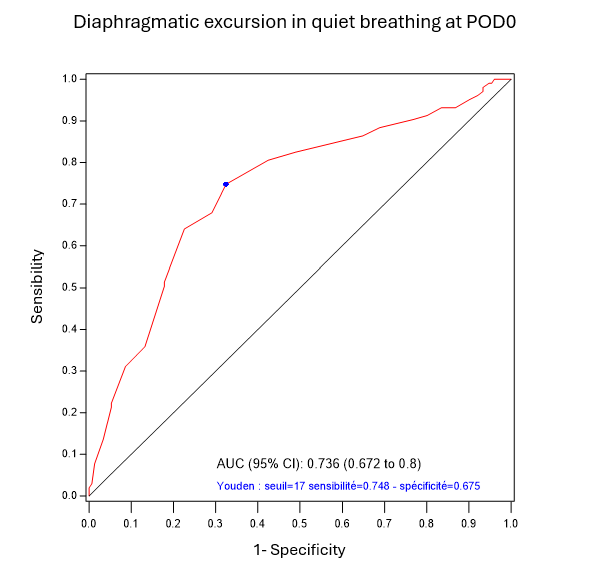


**eFigure 3.** ROC curve of diaphragmatic excursion in quiet breathing at postoperative day 0 for prediction of postoperative pulmonary complications.

Threshold = 17 mm, Sensibility = 0.75, Specificity= 0.68

DUS : diaphragmatic ultrasound ; LUS : lung ultrasound score; POD0 : postoperative day 0


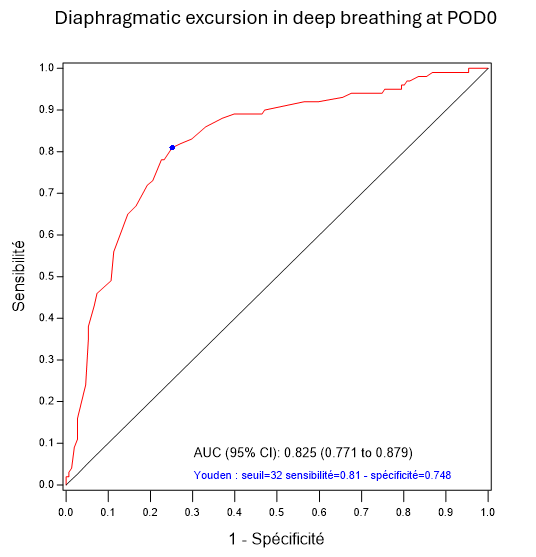


1- Specificity

Sensibility

**eFigure 4.** ROC curve of diaphragmatic excursion in deep breathing at postoperative day 0 for prediction of postoperative pulmonary complications.

Threshold 32 mm. Sensibility = 0.81 and specificity = 0.75

DUS : diaphragmatic ultrasound ; LUS : lung ultrasound score; POD0 : postoperative day 0

**eTable 4.** Association between lung ultrasound score (LUS) and individual PPC components

| **PPC component** | **POD0 LUS OR (95% CI)** | **p value** | **POD1 LUS OR (95% CI)** | **p value** |
| --- | --- | --- | --- | --- |
| Acute respiratory failure | 1.12 (1.04–1.19) | 0.001 | 1.15 (1.07–1.23) | <0.001 |
| Pneumonia | 1.12 (1.04–1.20) | 0.003 | 1.13 (1.05–1.22) | <0.001 |
| Pleural effusion | 1.13 (1.05–1.22) | 0.002 | 1.16 (1.08–1.25) | <0.001 |
| Atelectasis | 1.08 (0.98–1.17) | 0.11 | 1.13 (1.04–1.23) | 0.005 |

Abbreviations: CI, confidence interval; LUS, lung ultrasound score; POD, postoperative day; PPC, postoperative pulmonary complication.

**eTable 5.** Association between diaphragmatic excursion during deep and individual PPC components

| **PPC component** | **POD0 DUS OR (95% CI)** | **p value** | **POD1 LUS OR (95% CI)** | **p value** |
| --- | --- | --- | --- | --- |
| Acute respiratory failure | 0.152 (0.074-0.314) | <0.001 | 0.098 (0.042-0.230) | <0.001 |
| Pneumonia | 0.120 (0.048-0.301) | <0.001 | 0.137 (0.055-0.345) | <0.001 |
| Pleural effusion | 0.234 (0.096-0.574) | 0.002 | 0.301 (0.132-0.684) | 0.004 |
| Atelectasis | 0.324 (0.128-0.82) | 0.02 | 0.108 (0.031-0.373) | <0.001 |

Abbreviations: CI, confidence interval; DUS, diaphragmatic ultrasound; POD, postoperative day; PPC, postoperative pulmonary complication.

The diaphragmatic excursion during deep breathing was categorized using a threshold that optimized the Youden index (32 mm for POD0 and 31 mm for POD1).

**eTable 6.** Variables not retained in the final multivariable model

|  | **p-value** |
| --- | --- |
| Surgical approach | 0.83 |
| Neoplastic histology | 0.79 |
| Preoperative hemoglobin | 0.75 |
| Smoking status | 0.74 |
| ASA score | 0.08 |

Abbreviations: ASA, American Society of Anesthesiologists
